# Supplementary figures and images for: Data-driven visualization and comparative analysis of positive energy districts (PEDs) for inclusive urban energy transitions
Source: Research Square preprint supplement (doi:10.21203/rs.3.rs-8276910/v1), 2025-12-17

**Graphical Abstract**


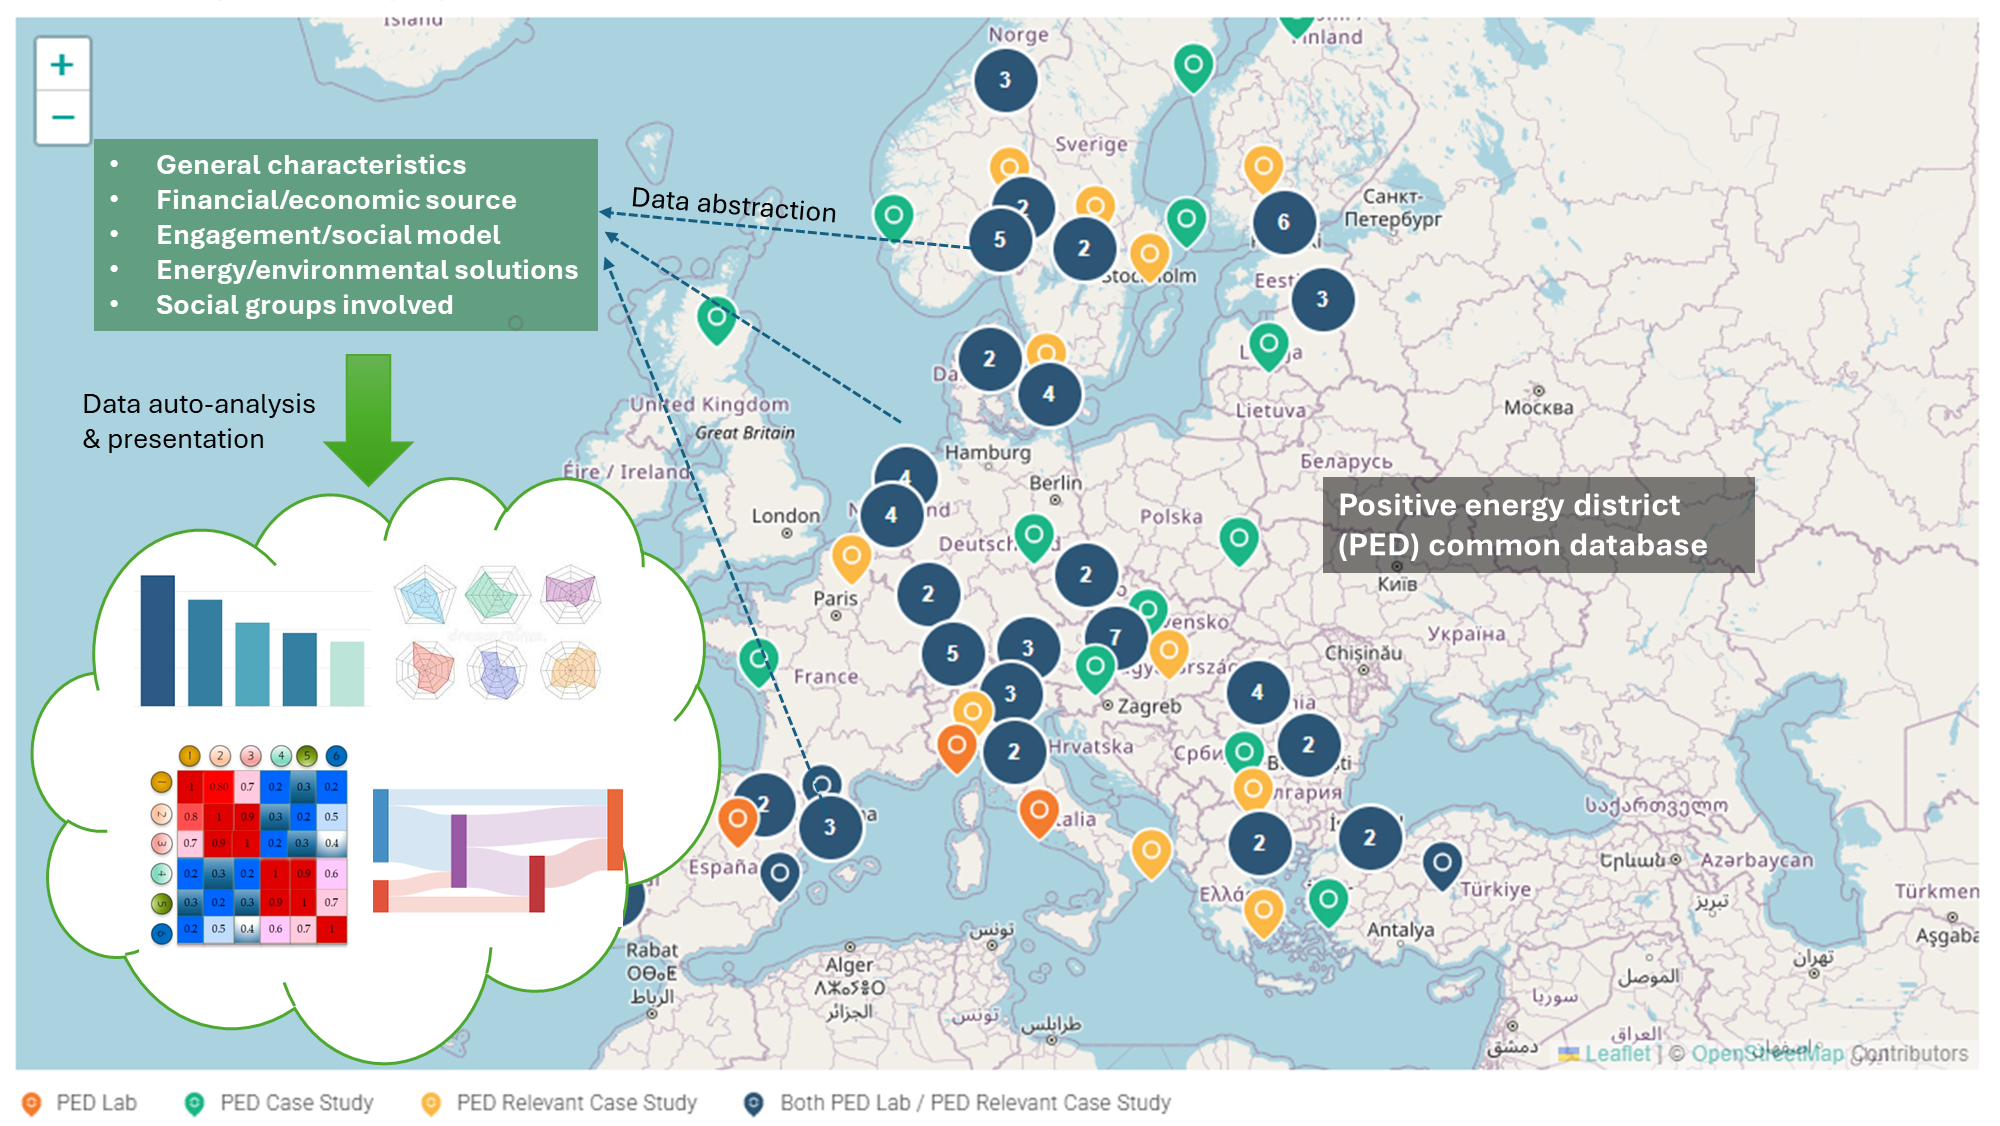

Supplement: Supplementary file 1 [file 1cdd3d5e5f4f68787fd19057.docx]
